# Supplementary material
Source: publisher figshare collection journal article supplement (https://acs.figshare.com/ndownloader/files/4655482)
Supplement: Supplementary file 1 [file 4655482]

# Adhesion force between rough surfaces

On rough surfaces the adhesion force is widely distributed (Götzinger et al. [34]). For example, adhesion force distributions of a  $10\mu m$  polystyrene particle and silicon wafer coated with  $110nm$  and  $250nm$   $SiO_2$  nanoparticles are shown in Figure 1. The wafers are coated with dip-coating technique [35], so that the particles build a densely packed monolayer on the wafer surface. These adhesion force measurements are carried out with AFM (Nanoscope IIIa) equipped with NP20 (Veeco, California) cantilevers with spring constants of  $0.245 N/m$ . The normal force is controlled in the range  $750 \pm 250 nN$ . The measured adhesion forces are shown in Table 1 in comparison with the simulation results.

The simulation results are achieved with normal forces of  $F_N = 845 nN$  for a wafer with  $110nm$   $SiO_2$  coating and  $F_N = 677 nN$  for wafer with  $250nm$   $SiO_2$  coating, respectively. These values fall in the range which is applied in the measurements. The simulation gives a reasonable fit for the minimal values of the adhesion forces, which is approximately equal to the adhesion force between the particle and a single asperity. Deviations occur because the exact position of the approaching sphere relative to surface asperity cannot be determined exactly in the experiment. Our methodology reported in (Götzinger et al. [34]) did show that adhesion forces distributions between a rigid sphere and a rough surface can be reproduced.

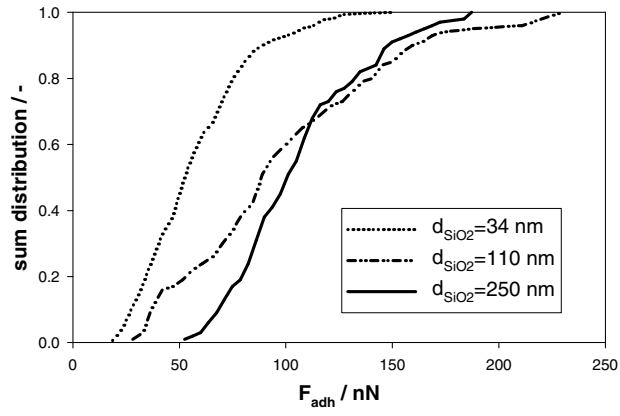

**Figure 1** Adhesion force distribution between a polystyrene particle and silicon wafers coated with 34 nm, 100 nm and 250 nm  $SiO_2$  nano-particles.

**Table 1** Adhesion forces measured with AFM in comparison with the predictions of simulation.

| Asperity size on substrate | $F_{adh, FEM}$ | $F_{adh, min}$ | $F_{adh, 50}$ |
|----------------------------|----------------|----------------|---------------|
| 34nm                       | 8 nN           | 19 nN          | 52 nN         |
| 110nm                      | 25 nN          | 28 nN          | 89 nN         |
| 250nm                      | 42 nN          | 52 nN          | 100 nN        |
